# Supplementary material
Source: Springer Nature journal article supplement (https://www.springermedizin.de/resource/supplementary/12889_2010_3372_MOESM3_ESM.pdf/9488860)

# All-cause mortality

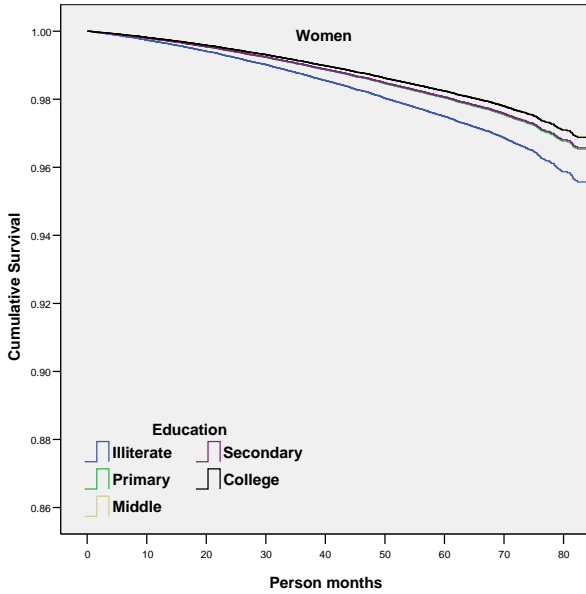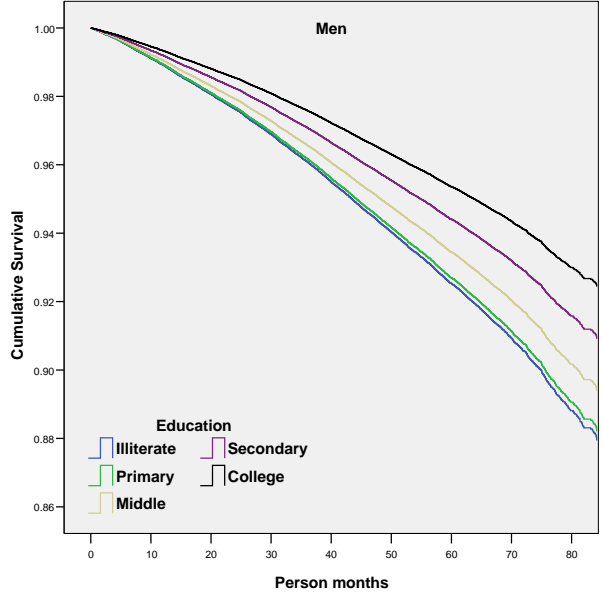

# CVD

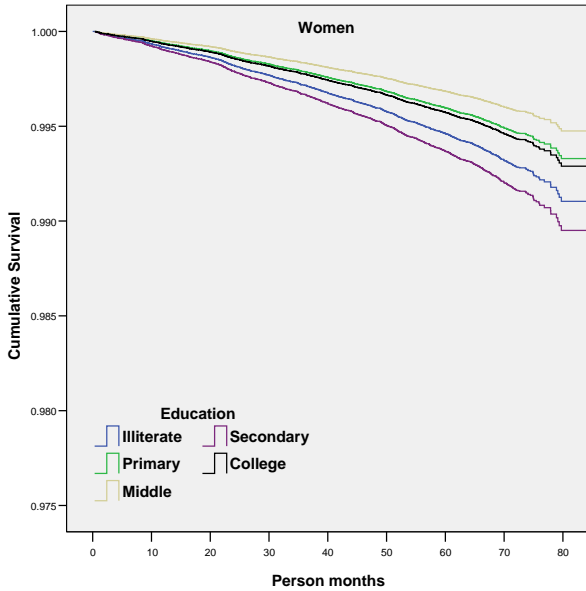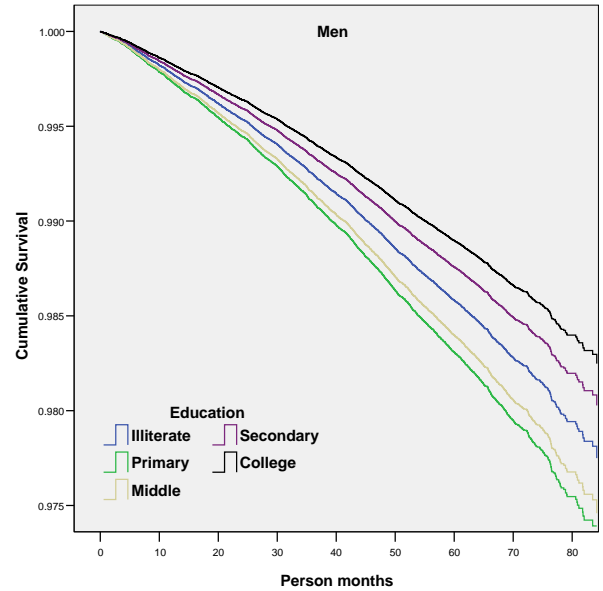

Supplement: MOESM3 [file 9488860]
